# Supplementary material for: pH-responsive cocktail drug nanocarriers by encapsulating paclitaxel with doxorubicin modified poly(amino acid)
Source: Royal Society of Chemistry journal article supplement (doi:10.1039/c5ra05939a), 2015-01-01
Supplement: c5ra05939a1.pdf [file c5ra05939a1.pdf]

## Electronic Supplementary Information

### **pH-Responsive Cocktail Drug Nanocarriers by Encapsulating Paclitaxel with Doxorubicin Modified Poly(amino acid)**

Qian He,<sup>†</sup> Sheng Huang,<sup>†</sup> Suying Xu and Leyu Wang\*

State Key Laboratory of Chemical Resource Engineering, Beijing Key Laboratory of Environmentally Harmful Chemical Analysis, Beijing University of Chemical Technology, Beijing 100029, China.

Email (L.Y. Wang): lywang@mail.buct.edu.cn; Tel and Fax: 86-10-64427869

To demonstrate the existence of H-bond, alternative experiments have been carried out. The polymer  $PSI_{OAm-DOX}$  were replaced by poly(styrene-methyl acrylic acid)(PSMAA) to prepare the PTX@PSMAA nanocapsules. For these nanocapsules, hydrophobic-hydrophobic interaction is the main driving force and they were stable in both pH 7.4 and pH 5.0 PBS (Figure S1), which further demonstrate the H-bond based nanocapsule disruption.

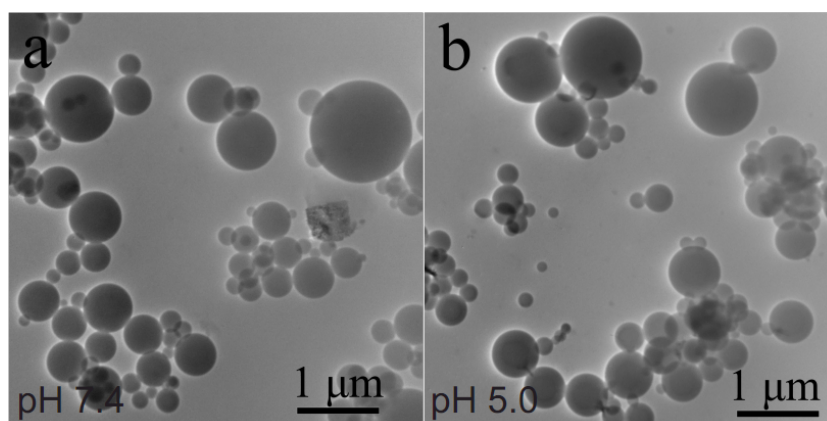

Figure S1 TEM images of PTX@PSMAA nanocapsules in pH (a) 7.4 and (b) pH 5.0 PBS, respectively.
